# Supplementary material
Source: MDPI journal article supplement (https://www.mdpi.com/2071-1050/11/9/2694)
Supplement: s1 [file s1]

## Supplementary Material

### Box 1: Broad Interview Schedule

#### Draft of Interview Questions Concerning Knowledge about Climate Change and Plane travel

Which Faculty are you located in?  
*Optional* – what department are you from?  
What level are you (A, B, C, D, E, other) ?  
How long have you been an academic (choices)?  
In 2016, how many times have you travelled internationally?  
Can you describe/detail these trips?  
In 2016, how many times a year did you travel domestically (give ranges)?  
Can you describe/detail these trips?  
Is this a usual rate of travel for you? (yes, no or more than, less than, about the same)  
To what extent could you have done these trips differently?  
What do you travel for? (e.g., data collection, networking, grant development, teaching, fun, family, research, conference attendance, conference presentations)  
Do you feel travel is necessary to you doing your job effectively?  
Why or why not?  
Do you think you have better chances at promotion if you travel?  
Why or why not?  
Are there any specific disciplinary or Faculty requirements or expectations that put extra pressure on staff to travel?  
If there were alternative and more sustainable ways of conducting your core business, would you take them?  
Why or why not? (open question)  
What incentives would you require to change how you travel and use alternative more sustainable options?  
Are you concerned about climate change?  
What is your view on the ethics of academics and travel?  
How do you see academics fitting in to the university's ambition to become carbon neutral?  
What, in your view, are the barriers to implement sustainable travel options?  
What is your view of carbon offsets?  
What, in your view, would be some incentives that would inspire academics to change their practice?  
Is there anything else you would like to add?

## Supplementary Material 2:

### Box 2: The Survey Instrument

#### Introduction

Our University and the City Of Adelaide has committed to carbon neutrality and a key pathway to achieving carbon reduction would be to develop institutional incentives that reward academics for reducing, where possible, their carbon footprint. This project aims to consider this issue and has the following aims.

- To develop a baseline understanding of what work-related plane travel academics do and why they do it.
- To identify blocks and incentives to using alternative academic travel options.

We are not suggesting that academics suddenly stop traveling, but that the results can help the university build alternative reward structures, appropriate benchmarks as well as the infrastructure and the processes that will enable it to become a leading role model of climate action.

Thank you for participating in our survey. All responses are completely anonymous. The ethics approval number is no H-2017-160.

**\* 1. Which faculty are you in?**

Faculty of Arts

Faculty of the Professions

Faculty of Engineering, Computer and Mathematical Sciences

Faculty of Sciences

Faculty of Health and Medical Sciences

**2. Which department are you in?**

**3. Which of the following best describes your current position?**

- ☐ Mainly teaching
- ☐ Teaching and research
- ☐ Mainly research

**\* 4. What level are you?**

☐

A

☐

D

☐

B

☐

E

☐

C

Other (please specify)

**5. How long have you been an academic**

☐

Less than a year

☐

Between 1-5 years

☐

5-10 years

☐

Over ten years

**6. In 2017, how many times did you travel internationally by plane for work?**

☐

None

☐

Four times

☐

Once

☐

Five times

☐

Twice

☐

More than five times

☐

Three times

**7. Is this a usual rate of international plane travel for you?**

☐

More than

☐

Less than

☐

About the same

**8. In 2017, how many times did you travel domestically by plane for work?**

☐

None

☐

Four times

☐

Once

☐

Five times

☐

Twice

☐

More than five times

☐

Three times

**9. Is this a usual rate of domestic plane travel for you?**

- ☐ More than
- ☐ Less than
- ☐ About the same

**\* 10. Please rank in order of importance the main purpose of your work related to plane travel in 2017:**

|                      |                          |
|----------------------|--------------------------|
| <input type="text"/> | Data collection          |
| <input type="text"/> | Networking               |
| <input type="text"/> | Grant development        |
| <input type="text"/> | Teaching                 |
| <input type="text"/> | Conference attendance    |
| <input type="text"/> | Conference presentations |

**11. Please state any other important reason why you travelled by plane in 2017:**

**12. Do you think plane travel is necessary for academics to do their job effectively?**

- ☐ Yes
- ☐ No

Why? Please comment.

**13. Do you think plane travel is necessary for job progression?**

- ☐ Yes
- ☐ No

Why? Please comment.

**14. In 2017, did you use any of the following alternative travel options to conduct your academic work?**

- |                                                                |                                   |
|----------------------------------------------------------------|-----------------------------------|
| <input type="radio"/> University video conferencing            | <input type="radio"/> Google docs |
| <input type="radio"/> Skype or other online video conferencing | <input type="radio"/> Webinar     |
| <input type="radio"/> Phone link-up                            | <input type="radio"/> Zoom        |
| <input type="radio"/> Used interstate train or bus services    |                                   |

Please comment on your experience of using such alternative options.

**15. What barriers (personal and/or institutional) do you think exist that prevent academics from using alternative travel options?**

**16. What is your opinion on carbon off-setting academic plane travel?**

**17. Are you concerned about the impact of academic plane travel on climate change?**

- ☐ Yes
- ☐ No

Please comment.

**18. What personal and/or institutional incentives do you think would encourage academics to use alternative travel options?**

**19. Is there anything else you would like to say about academic plane travel and working at the University of Adelaide?**

**20. Are you aware/familiar with the University's Ecoversity policy?**

☐ Yes ☐ No
